# Supplementary material for: A biomimicking and electrostatic self-assembly strategy for the preparation of glycopolymer decorated photoactive nanoparticles
Source: Royal Society of Chemistry journal article supplement (doi:10.1039/c6py00129g), 2016-01-01
Supplement: c6py00129g1.pdf [file c6py00129g1.pdf]

## Supporting information

### A biomimicking and electrostatic self-assembly strategy for the preparation of glycopolymer decorated photoactive nanoparticles

KuiChen, Meimei Bao, Alexandra Muñoz Bonilla, Weidong Zhang and Gaojian Chen

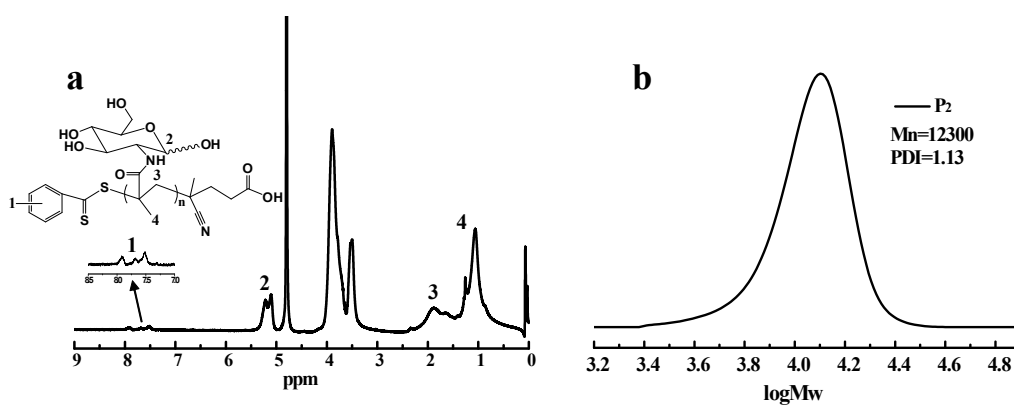

Fig. S1 (a) <sup>1</sup>H-NMR (in D<sub>2</sub>O) spectrum and (b) GPC spectrum (in DMF) of P<sub>2</sub>.

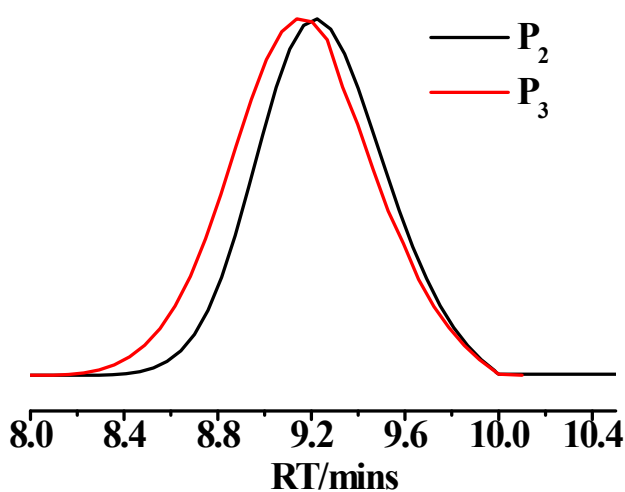

Fig.S2 Aqueous GPC traces of P<sub>2</sub> and P<sub>3</sub>.

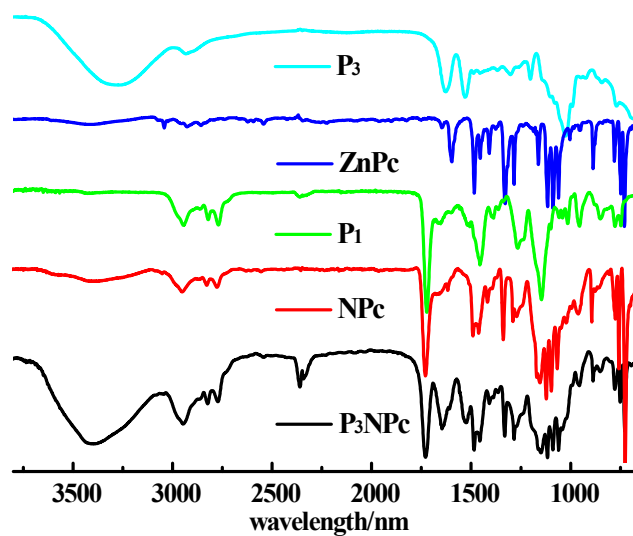

Fig. S3 IR spectra of the ZnPc, P<sub>3</sub>, P<sub>1</sub>, NPc and GNPc.

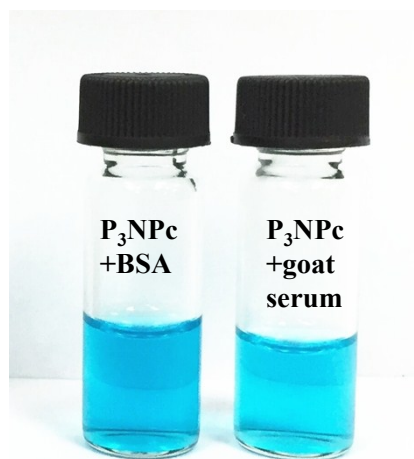

Fig. S4 Mix of P<sub>3</sub>NPc with BSA and goat serum after one month.

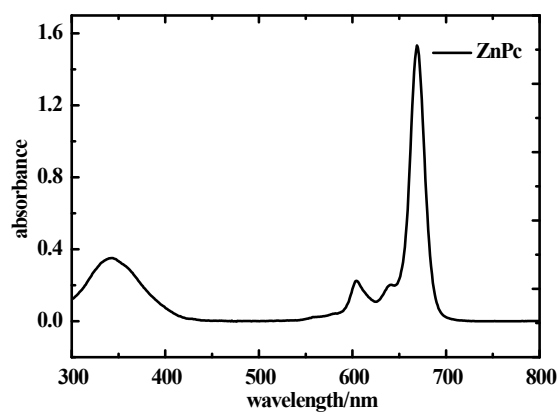

Fig. S5 UV absorption spectrum of ZnPc in DMF.

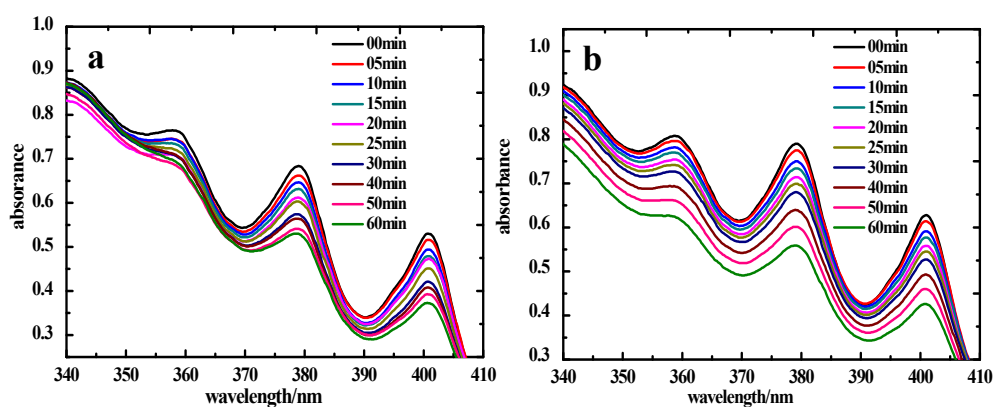

Fig. S6 UV absorption spectra for the determination of singlet oxygen quantum yield.

(a) UV absorption spectra of ZnPcS<sub>4</sub> in aqueous media. (ADMA: 0.028 mg/ml,

ZnPcS<sub>4</sub>: 0.018 mg/ml). (b) UV absorption spectra of P<sub>3</sub>NPc in aqueous media.

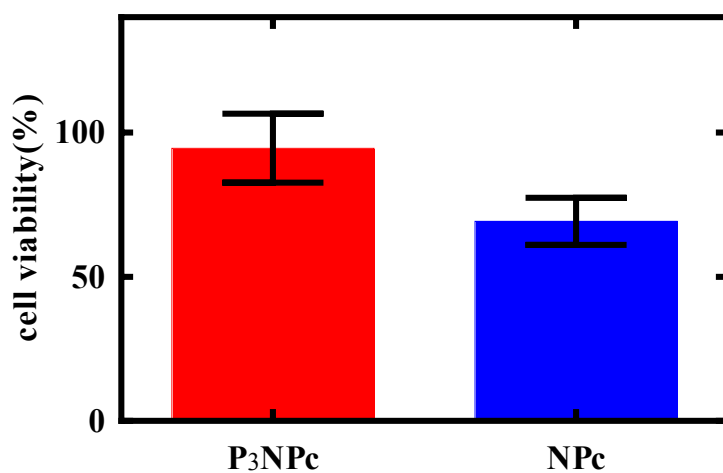

Fig. S7 The cell viability of HeLa cells incubated with P<sub>3</sub>NPc and NPc in dark for 24 h, using the pH 7.4 PBS buffer as the control.

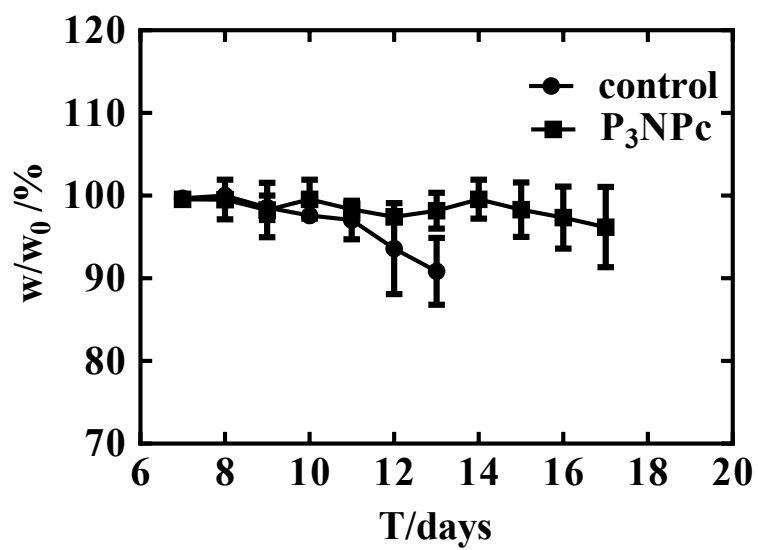

Fig. S8 Evolution of the body weight of the mice during the experiments.
